# Supplementary material for: Structural and functional analysis of the GABARAP interaction motif (GIM)
Source: PubMed Central journal article supplement (PMC5538626; doi:10.15252/embr.201643587), 2017-06-27
Supplement: EMBR-18-1382-s003.pdf [file EMBR-18-1382-s003.pdf]

# Source Data for Figure 2

## Fig 2B - X-Ray Film

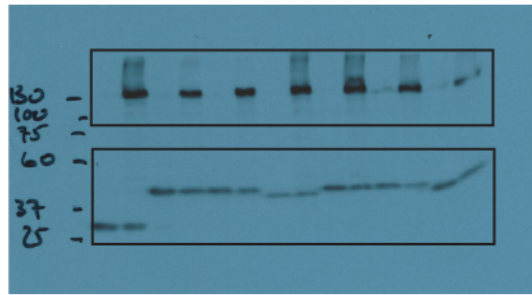

Anti-Flag (Input; Upper);  
Anti-GFP (Input; lower)

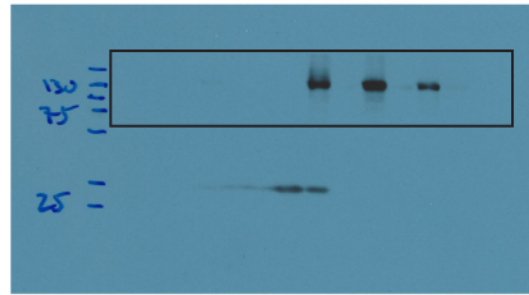

Anti-Flag (IP)

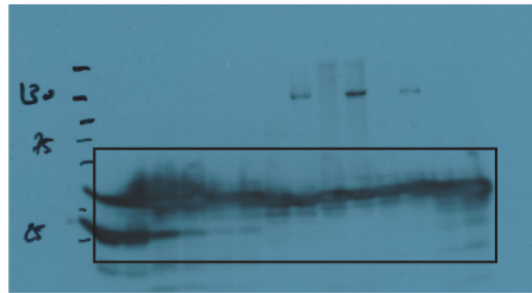

Anti-GFP (IP)

## Fig 2C - BIORAD ChemiDoc

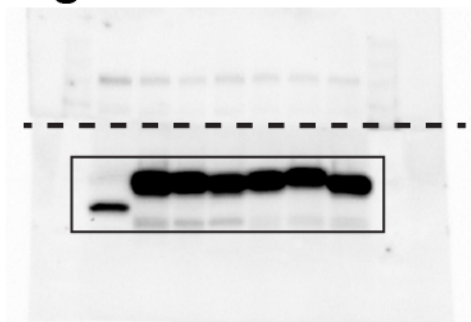

Anti-GFP (Input; Lower)

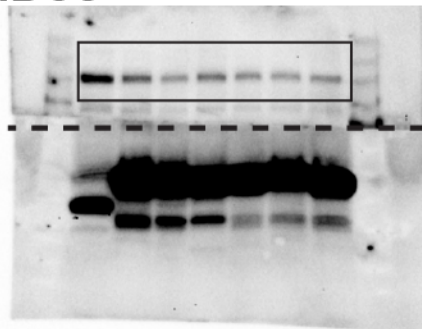

Anti-Plekhm1 (Input; Upper)

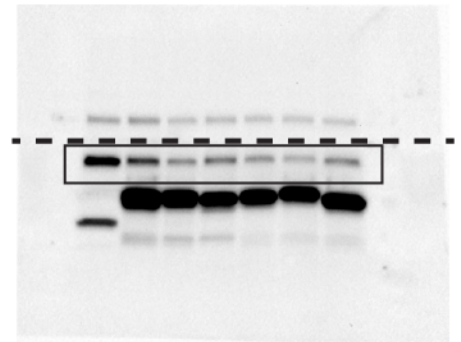

Anti-P62 (Input; lower)

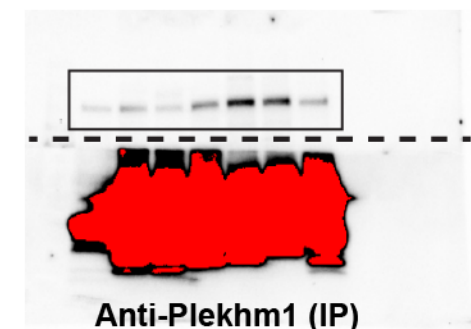

Anti-Plekhm1 (IP)

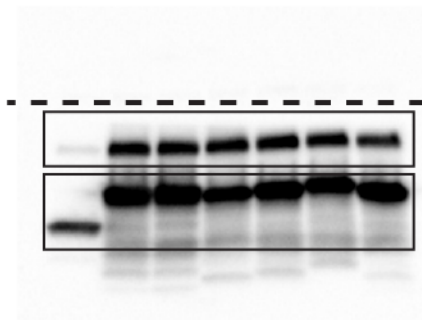

Anti-P62 (IIP)

Anti-GFP (IP)

## Fig 2D - BIORAD ChemiDoc

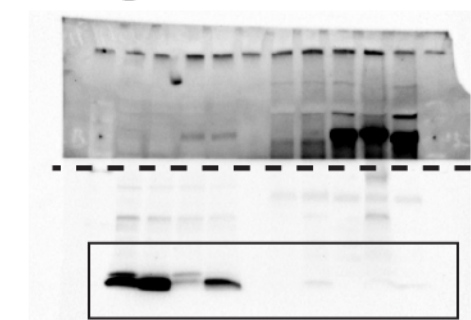

Anti-LC3B

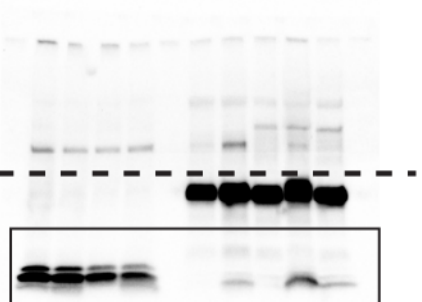

Anti-GABARAP

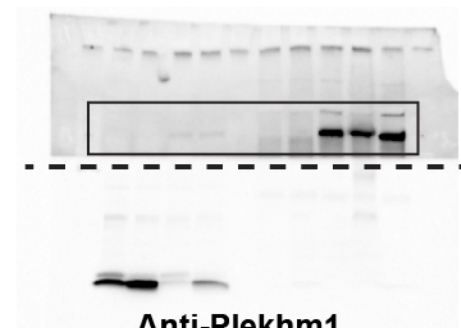

Anti-Plekhm1
