# Supplementary material for: Structural and functional analysis of the GABARAP interaction motif (GIM)
Source: PubMed Central journal article supplement (PMC5538626; doi:10.15252/embr.201643587), 2017-06-27
Supplement: EMBR-18-1382-s004.pdf [file EMBR-18-1382-s004.pdf]

Source Data for Figure 4

Fig 4C - X-Ray Film

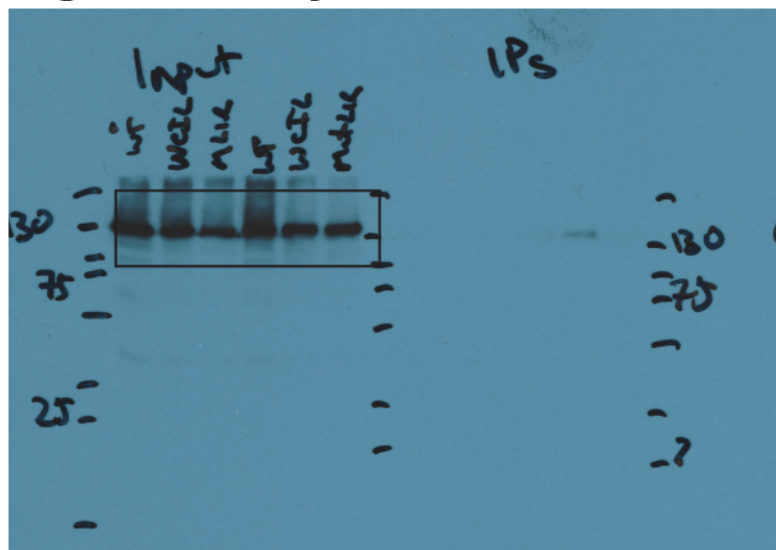

Anti-Flag (Input)

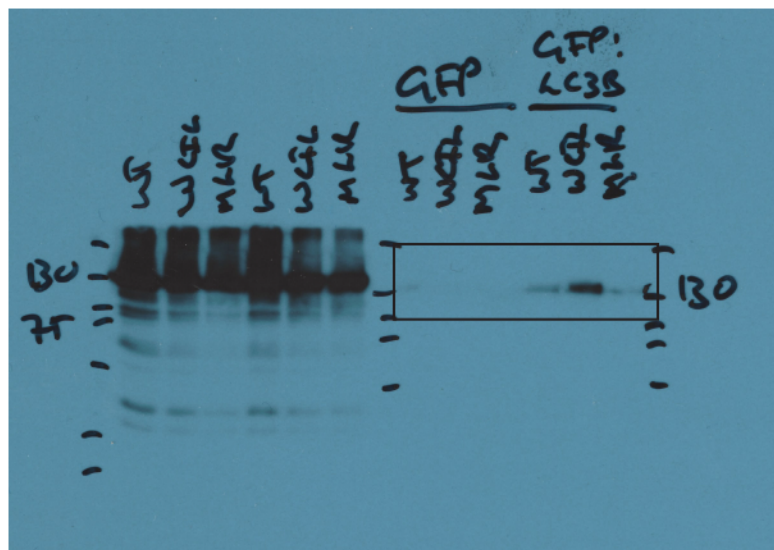

Anti-Flag (IP)

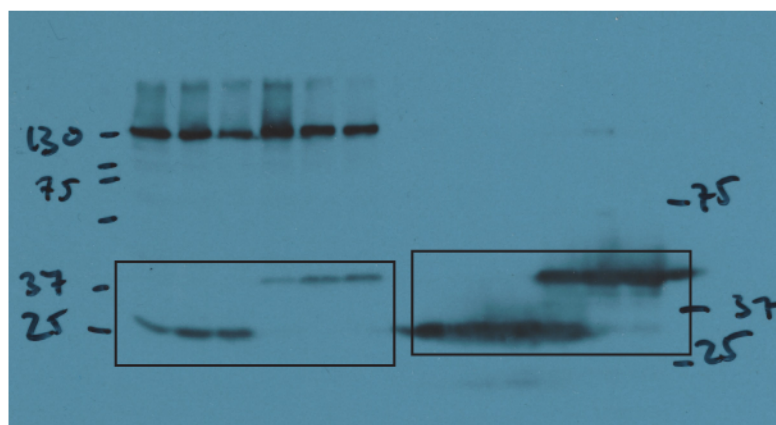

Anti-GFP (Input)

Anti-GFP (IP)
