# Supplementary material for: Structural and functional analysis of the GABARAP interaction motif (GIM)
Source: PubMed Central journal article supplement (PMC5538626; doi:10.15252/embr.201643587), 2017-06-27
Supplement: EMBR-18-1382-s005.pdf [file EMBR-18-1382-s005.pdf]

# Source Data for Figure 5

## Fig 5B - X-Ray Film

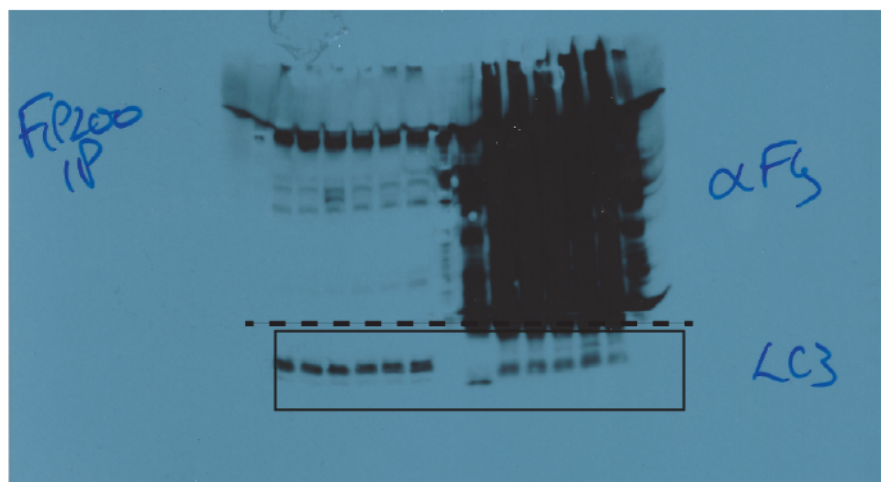

ANTI-LC3 (INPUT & IP)

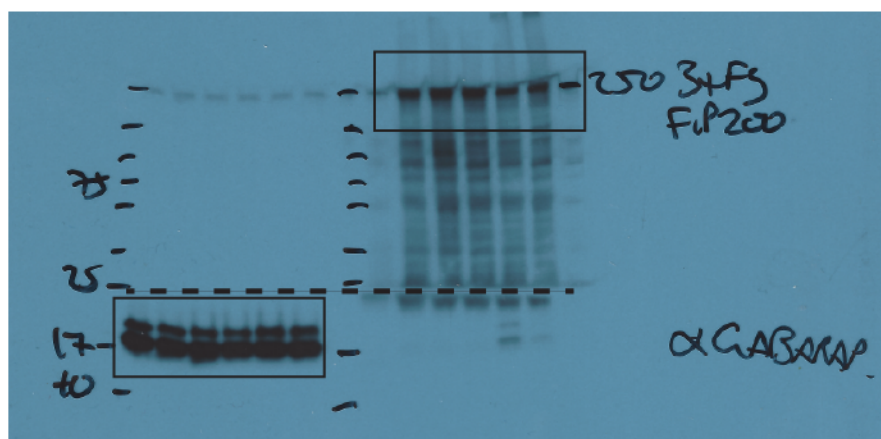

ANTI-FLAG (FIP200; IP)

Anti-GABARAP (Input)

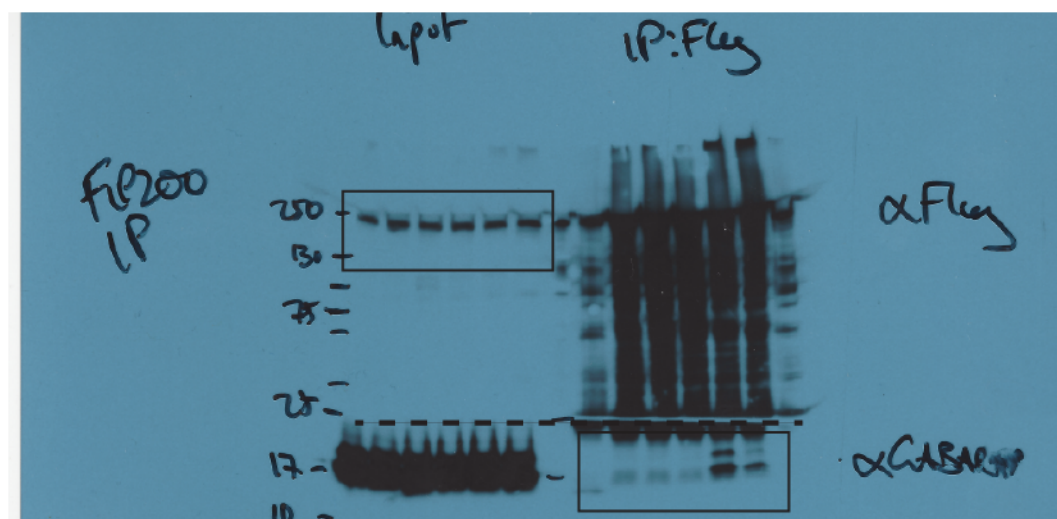

ANTI-FLAG (INPUT; FIP200)

Anti-GABARAP (IP)

# Fig 5C- X-Ray Film

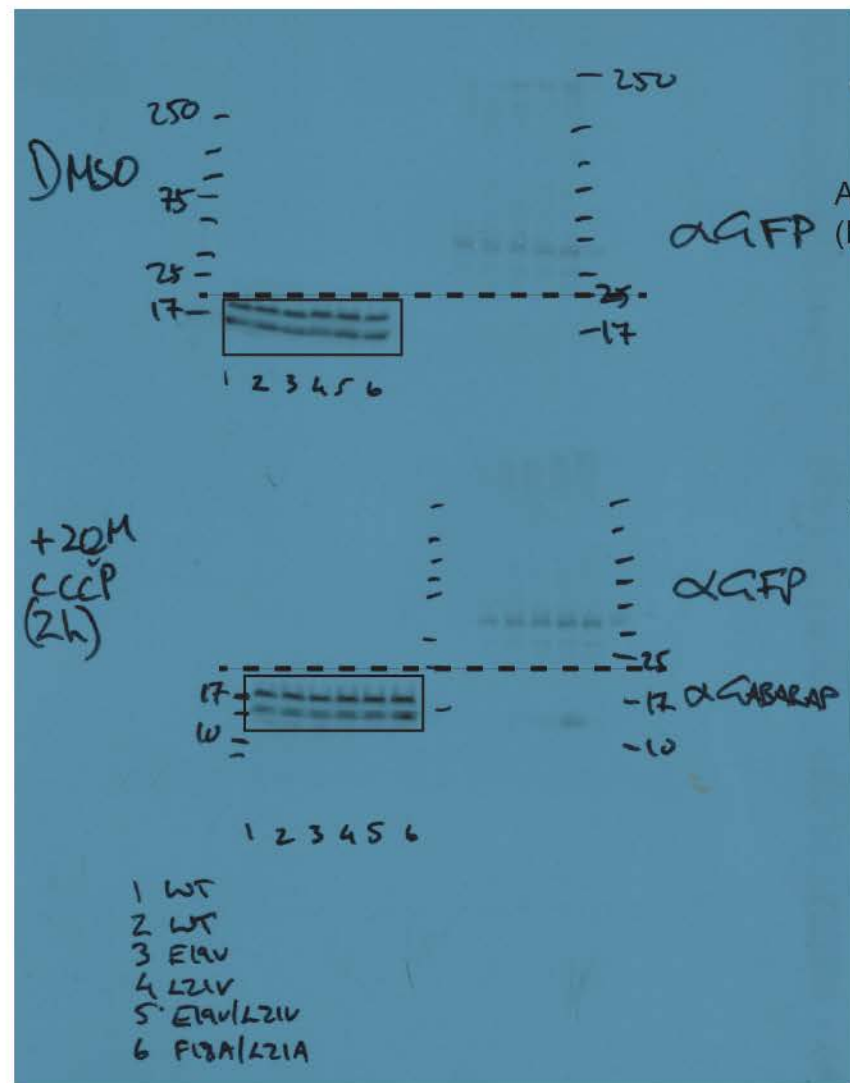

Anti-GABARAP (Input ;DMSO upper; CCCP lower)

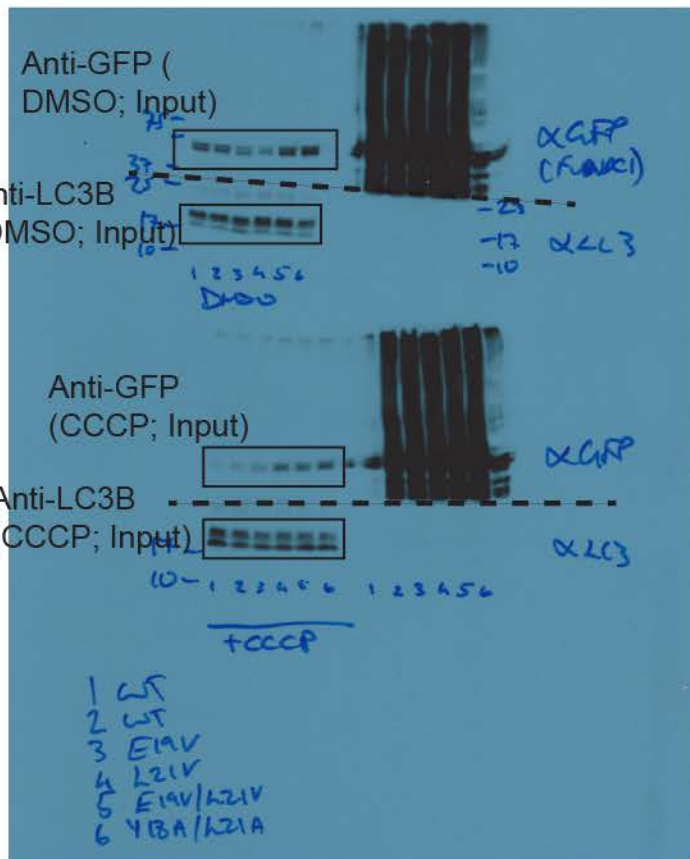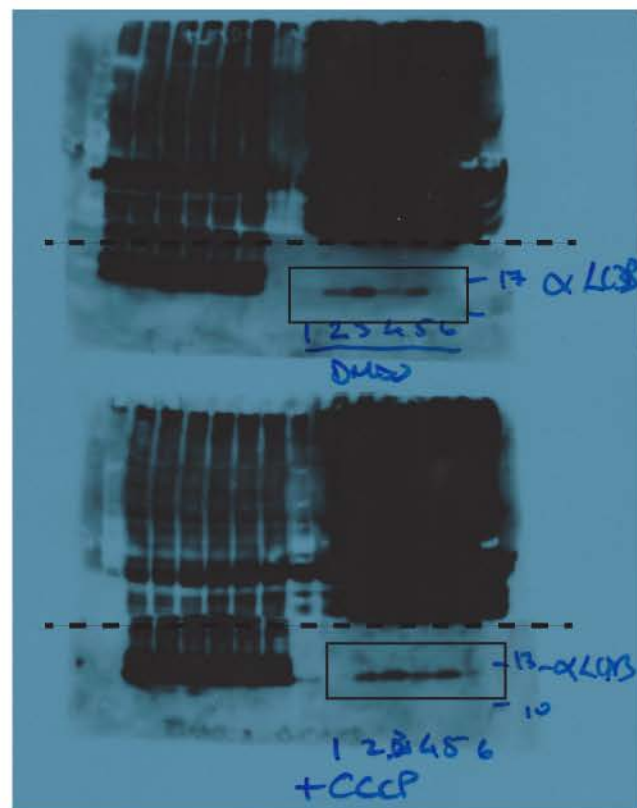

Anti-LC3B (IP;DMSO upper; CCCP lower)

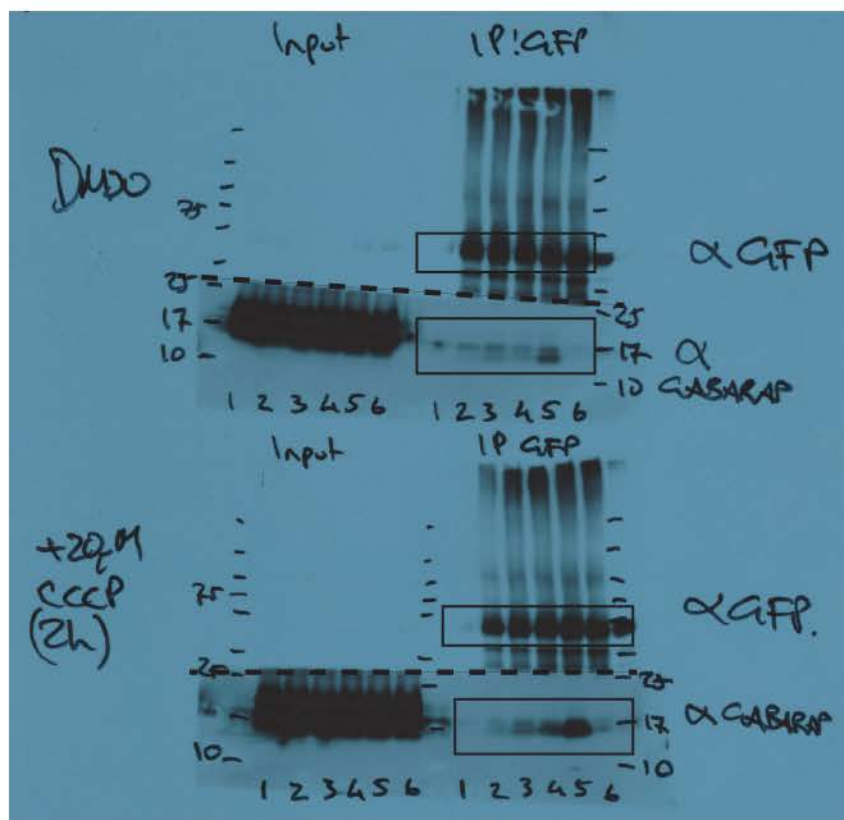

Anti-GFP (Input ;DMSO upper blot ; CCCP lower blot )

Anti-GABARAP (Input ;DMSO upper blot ; CCCP lower blot )
